# Supplementary material
Source: Springer Nature journal article supplement (https://www.springermedizin.de/resource/supplementary/13014_2013_1030_MOESM1_ESM.pdf/9635134)

**GI toxicity grade 2+**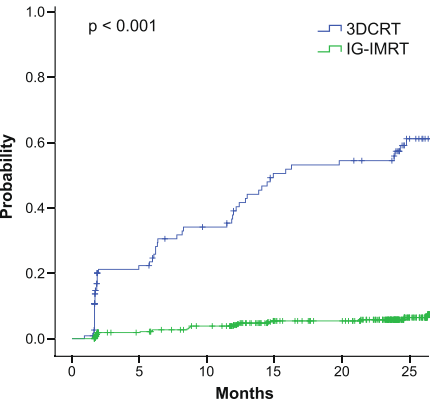**GU toxicity grade 2+**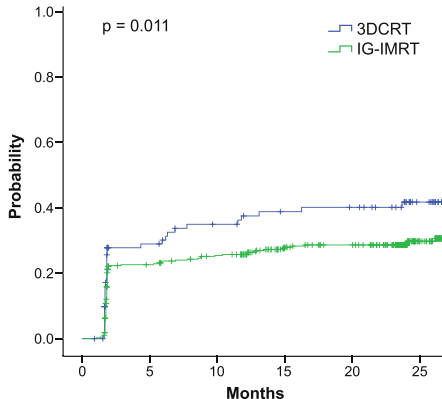

Supplement: MOESM1 [file 9635134]
